## Crucial role of extra-domain A containing fibronectin for the development of pulmonary hypertension and associated right heart failure

I. Singerer<sup>1</sup>, K. Gruen<sup>1</sup>, A. Schreppler<sup>2</sup>, L. Baez<sup>1</sup>, M. Schwarzer<sup>2</sup>, R. Bauer<sup>3</sup>, C. Jung<sup>4</sup>, A. Berndt<sup>5</sup>, P.C. Schulze<sup>1</sup>, M. Franz<sup>1</sup>

<sup>1</sup>University Hospital Jena, Department of Internal Medicine I, Jena, Germany; <sup>2</sup>University Hospital Jena, Department of Cardiothoracic Surgery, Jena, Germany; <sup>3</sup>University Hospital Jena, Institute of Molecular Cell Biology, Jena, Germany; <sup>4</sup>Heinrich-Heine-University, Department of Internal Medicine, Division of Cardiology, Pulmonology and Vascular Medicine, Düsseldorf, Germany; <sup>5</sup>University Hospital of Jena, Institut of Legal Medicine, Section of Pathology, Jena, Germany

**Funding Acknowledgement:** Type of funding sources: Public hospital(s). Main funding source(s): University Hospital Jena

**Background:** Pulmonary vascular and right ventricular myocardial remodeling are unique phenomena in PH progression. Both processes are accompanied by an abundant re-expression of the extra-domain A of fibronectin (ED-A+ Fn) therefore qualifying as promising biomarker or even therapeutic target. Nevertheless, its functional role in PH pathogenesis remains unclear until now. Objective: The purpose of our study was to analyse the development of PH and RHF in a mouse model of monocrotaline (MCT)-induced PH comparing C57BL/6 ED-A+ Fn knockout (KO) and wild-type (WT) mice.

**Methods:** PH was induced by subcutaneous injection of a single dose of MCT (60 mg/kg body weight). Subgroups were additionally treated with the dual endothelin receptor antagonist Macitentan (MAC, 15mg/kg body weight per day from day 14 to 28). There were 6 experimental groups: sham-treated control WT mice (WTco, n=4); MCT induced PH WT mice (WTPH, n=6); MCT induced PH WT mice treated with MAC (WTPH\_MAC, n=6); sham-treated control KO mice (KOco, n=4); MCT induced PH KO mice (KOPH, n=6); MCT induced PH KO mice treated with MAC (KOPH\_MAC, n=6). Between day 26 and 28, transthoracic echocardiography and right heart catheterization were performed. Both, lung and cardiac tissue samples were subjected to histological analyses.

**Results:** Right heart catheterization revealed significantly increased RVPsys values in WTPH (87.0±16.4mmHg) compared to WTco (36.1±9.4mmHg; p=0.034) animals, which showed, at least in trend, a diminution

in the WTPH\_MAC group (67.1±20.9mmHg; p=n.s.). There was a non-significant increase in RVPsys in the KOPH (55.6±14.9mmHg) compared to KOco mice (37.2±5.6mmHg; p=n.s.) without any differences compared to the KOPH\_MAC group (60.9±14.0mmHg; p=n.s.). When comparing the WTPH and the KOPH group, RVPsys was significantly lower in the KO animals (p=0.014), while there were no differences between the WTPH\_MAC and the KOPH\_MAC group (p=n.s.). Echocardiographic evaluation including surrogate parameters of right ventricular (RV) overload and failure were significantly altered in WTPH compared to WTco animals (p<0.05) and could not be shown to be relevantly improved in the WTPH\_MAC group (p=n.s.). The majority of echocardiographic parameters did not significantly differ between the KOPH and the KOco group (p=n.s.). Lung tissue analysis revealed significant alterations in both, the WTPH and the KOPH group, each compared to the corresponding control (p<0.05). The level of lung tissue damage was significantly decreased in KOPH compared to WTPH mice (p<0.05). In RV, the amount of interstitial fibrosis was increased in the WTPH (p=0.009) but not in the KOPH group (p=n.s.), each compared to the corresponding controls.

**Conclusions:** The findings of the current study underline the hypothesis that ED-A+ Fn is a key player in the pathogenesis of PH and associated RHF. Thus, it might represent a promising therapeutic target, e.g., by the administration of neutralizing antibodies.
